# Supplementary material
Source: MDPI journal article supplement (https://www.mdpi.com/2073-4441/11/11/2410)
Supplement: s1 [file s1]

Qualitative analysis themes from interview data for: *Jackson, et al. (2019). Identifying and overcoming barriers to sustainable collaborative water governance in remote Indigenous Australian communities*

37 High level themes emerged from the data in the first round of coding, some with sub-themes, based on an inductive process of thematic analysis of interviews and key project documentation. The table presents the NVivo Codebook extract – initial coding categories based on inductive identification of themes and number of files and references. Descriptions applied helped to determine the themes and were subsequently refined and clustered into five high level categories and thirteen barriers as described in the paper.

Table S1. Themes generated from first cycle coding of practitioner interviews in remote Indigenous community water management, Australia

| Name                                                 | Description                                                                                                                                                                                                                                                                                                            | Files | References |
|------------------------------------------------------|------------------------------------------------------------------------------------------------------------------------------------------------------------------------------------------------------------------------------------------------------------------------------------------------------------------------|-------|------------|
| Barriers or challenges                               | Broadly, any factors identified that constrain, impede or prevent the trial, application and implementation of collaborative, community-based management approaches to sustainable community water. Factors include, but are not limited to, actions, tools, techniques, people, practices, methods, frames or values. | 27    | 174        |
| Broader Social Benefits & Outcomes                   | Relates to perceptions of benefits beyond technical infrastructure or water and energy sustainability including community development or economic development opportunities.                                                                                                                                           | 14    | 34         |
| Community Engagement Design within projects_programs | Relates to what was designed/or ideas within planning stages, prior to implementation and the extent of or capacity for community engagement design into projects, programs.                                                                                                                                           | 26    | 319        |
| Community Engagement or Involvement                  | All aspects of engaging community members or leading to engaging community                                                                                                                                                                                                                                             | 24    | 229        |
| Champions /In-Community Manager or contact           | Relates to interviewee references to key people within communities who act as champions or leaders in water management and community engagement                                                                                                                                                                        | 15    | 30         |
| Community Engagement Methods                         | Relates specifically to the mechanisms use to involve or engage communities e.g. - communications, materials, techniques, tools and so on                                                                                                                                                                              | 22    | 111        |

| Name                                                  | Description                                                                                                                                                                                                      | Files | References |
|-------------------------------------------------------|------------------------------------------------------------------------------------------------------------------------------------------------------------------------------------------------------------------|-------|------------|
| Employees in community - engagement                   | Relates to local employees in water sector - this node differs to general community engagement                                                                                                                   | 10    | 31         |
| Community Needs, Wants & Goals                        | Relates to perceptions of community needs, preferences in terms of outcomes or longer-term goals and objectives - across a broad range of areas.                                                                 | 11    | 30         |
| Complexity                                            | Relates to the complexity of managing water or working in communities, the specific problems and issues, or of the system as a whole.                                                                            | 10    | 20         |
| Conflict                                              | Relates to any perceived conflicts, or conflicting views or ideas that lead to disharmony within the community or between community and outside agencies.                                                        | 8     | 13         |
| Confusion                                             | Relates to uncertainty and confusion about a process or purpose or situation or technology etc.                                                                                                                  | 4     | 7          |
| Continual or Social Learning                          | Relates to learning from previous experiences and implementation or from other regions or sectors, lessons, sharing information and structures that support these                                                | 17    | 38         |
| Control and influence                                 | Relates to the ability to exert control or influence what pathways or actions are taken (sub-theme related to 'what they know best' or what's perceived as easiest to control or influence it)                   | 4     | 7          |
| Cultural Practices, Values, Meanings and Perspectives | Relates to interpretations or perspectives, practices driven by cultural values and norms and traditions whether Indigenous or organisational, in relation to how water is managed.                              | 25    | 148        |
| Best Practice                                         | Relates to perception of good or best practice in terms of organisational culture or engaging with Indigenous people or in sustainable water.                                                                    | 11    | 20         |
| Clash of cultures                                     | Relates to mismatch in viewpoints and understanding due specifically to socio-cultural factors, focus on Western and Aboriginal or Torres Strait Island worldviews, practices, traditions, values, norms, taboos | 10    | 21         |
| Community view of Government                          | Relates to how Indigenous people or a community views or has expectations of government and government services or resources or funds.                                                                           | 12    | 18         |

| Name                                           | Description                                                                                                                                                                                                                                                                                                                                  | Files | References |
|------------------------------------------------|----------------------------------------------------------------------------------------------------------------------------------------------------------------------------------------------------------------------------------------------------------------------------------------------------------------------------------------------|-------|------------|
| Water behaviours and practices                 | Relates to social and cultural practices and norms that influence individual (within an organisation or household ) behaviours around water use and management                                                                                                                                                                               | 11    | 22         |
| Data and Information                           | Relates to data and information processes, handling, collection, value of, use of.                                                                                                                                                                                                                                                           | 22    | 86         |
| Smart Meters                                   | Relates to smart meters, metering systems, and associated data outputs, how they are used, value of...                                                                                                                                                                                                                                       | 9     | 19         |
| Economic & Financial                           | Relates to anything to do with economy, economics of projects and funding, cost effectiveness, investment, economic development in communities and pricing/charging for resources                                                                                                                                                            | 20    | 143        |
| Costs & cost effectiveness & budget allocation | Relates to perceived or actual costs and value of operating a program/strategy/engagement approach or infrastructure and whether it is perceived as cost effective, criteria considered to determine this                                                                                                                                    | 11    | 26         |
| Economic development in communities            | Relates to broader economic development features and factors, i.e. the need for, causes, results, beyond projects at a larger scale                                                                                                                                                                                                          | 6     | 12         |
| Funding - Project                              | Relates to background and context on who funds and initiates projects and what they fund and don't fund, how the funding is distributed, timing and so on                                                                                                                                                                                    | 20    | 53         |
| Pricing and charging                           | Anything that comments on pricing, charging for water or energy                                                                                                                                                                                                                                                                              | 10    | 22         |
| Enablers & opportunities                       | Factors that facilitate collaborative, community-based sustainable water management approaches and their implementation and uptake and likely success. Factors include, but are not limited to: actions, tools, techniques, people, practices, methods, frames or values. Opportunities may not have evidence as enabling, but show promise. | 21    | 98         |
| Frameworks and Tools                           | Relates to any frameworks, theories, tools, methods that were used or recommended by interviewees or in projects or within water management                                                                                                                                                                                                  | 6     | 15         |
| Sustainable Livelihoods                        | Anything about sustainable livelihoods                                                                                                                                                                                                                                                                                                       | 3     | 5          |
| Future-plans, long-term planning, or           | Relates to future demand and considerations of need for the longer-term, e.g.                                                                                                                                                                                                                                                                | 16    | 50         |

| Name                                      | Description                                                                                                                                                                         | Files | References |
|-------------------------------------------|-------------------------------------------------------------------------------------------------------------------------------------------------------------------------------------|-------|------------|
| future-proofing                           | planning, strategy                                                                                                                                                                  |       |            |
| Housing                                   | Relates to housing - public housing, department of housing, private housing, e.g. maintenance, building materials, equipment, responsibilities and so on                            | 13    | 25         |
| Independence or Dependency                | Relates to perceptions of the independence or dependence of Indigenous communities in relation to economy, decision-making and in relation to government                            | 7     | 14         |
| Informal channels & non-official pathways | Relates to interviewee referencing going around “official” channels to overcome problems and barriers in relation to sustainable water and energy. Communications, maintenance etc. | 5     | 5          |
| Infrastructure Governance and Management  | Relates to the governance and management of infrastructure including roles and responsibilities, processes and structures in place or needed                                        | 28    | 292        |
| Institutional Structures                  | Relates to structures and processes of government, industry, those organisations that have responsibility for water and the interactions between them                               | 26    | 109        |
| Processes followed or required            | Relates to governance or management processes that are employed, deployed, used, required etc.                                                                                      | 24    | 82         |
| Prioritisation processes                  | Relates to how service providers prioritise communities or infrastructure decisions and/or how communities prioritise goals and objectives                                          | 16    | 36         |
| Roles & Responsibility                    | Relates to who does what or who should be doing what and the breakdown of those roles (and how effectively they work)                                                               | 26    | 113        |
| Land Ownership_Tenure                     | relates to land ownership, tenure of land, native title, access to land, disputes and so on                                                                                         | 5     | 7          |
| Leadership                                | Relates to individual, organisational and community leadership and how that emerges or is facilitated. Includes leadership for sustainability and in water and energy management.   | 11    | 39         |
| Leaks and Maintenance                     | Relates to water leaks, maintenance processes, leak detection and identification (diagnostic tools or processes) and reporting processes                                            | 19    | 43         |

| Name                                           | Description                                                                                                                                                                                                                    | Files | References |
|------------------------------------------------|--------------------------------------------------------------------------------------------------------------------------------------------------------------------------------------------------------------------------------|-------|------------|
| Participation and Collaboration                | Participation in broader activities (differs from community engagement node which focuses on how communities are engaged by service providers) including communities or other stakeholders. Relates to collaborative processes | 24    | 94         |
| Partnership building and relationship building | Relates to working together across or within organisations. Relationships, efforts at or need for building of relationships between communities and other stakeholders. Examples of or reference to partnership approaches.    | 23    | 85         |
| Processes                                      | Relates to processes - the how of things (not as specific to infrastructure governance processes node). Includes 'how things work' in communities                                                                              | 24    | 76         |
| Program_Projects                               | Relates to programs or projects for W&E or Sustainability - drivers for, implementation and project governance, results, lessons or evaluations. Includes reference to specific projects                                       | 27    | 610        |
| Drivers for Projects                           | Relates to reasons projects came into being.                                                                                                                                                                                   | 23    | 82         |
| Evaluation and Results                         | Relates to the process of evaluation of the thing implemented or perceptions of how successful a process, methods, strategy was in achieving the purpose.                                                                      | 15    | 73         |
| Lessons for designing W&E projects             | Relates to lessons for design in future - that weren't implemented or tested                                                                                                                                                   | 25    | 171        |
| Project Governance                             | Relates to how projects are set up in terms of ownership, funding, responsibilities and how these are managed throughout the project lifespan                                                                                  | 23    | 78         |
| Projects of interest                           | Potential case study examples referred to by interviewees                                                                                                                                                                      | 20    | 69         |
| W&E Projects What Was Done                     | Relates to things that have been implemented in relation to water or energy projects, programs or activities                                                                                                                   | 24    | 116        |
| Reflections on objectives and past approaches  | Relates to interviewee reflecting on or questioning value of standard practice or past approaches to engagement and sustainability                                                                                             | 12    | 52         |
| Problems associated with standard practice     | Relates to observed or experienced impacts and consequences from examples that have been implemented                                                                                                                           | 10    | 32         |
| Resource availability or constraint            | Relates to making resources - time, people, materials, available for community-based                                                                                                                                           | 10    | 24         |

| Name                                         | Description                                                                                                                                                                                                                                                           | Files | References |
|----------------------------------------------|-----------------------------------------------------------------------------------------------------------------------------------------------------------------------------------------------------------------------------------------------------------------------|-------|------------|
|                                              | water/energy management                                                                                                                                                                                                                                               |       |            |
| Self-interest and protecting own interests   | Relates to where self-interest is presented at cost to others, whether SPs to community or vice versa, employees, leaders etc.                                                                                                                                        | 9     | 16         |
| Skills, Jobs, Capacity, Training & Education | Broad category - relates to need for or experiences with these - within communities or service provider/management organisations                                                                                                                                      | 24    | 116        |
| Strengths                                    | Relates to perceived strengths of regions or communities or Indigenous people - relevant in that they can be drawn on or built on for future                                                                                                                          | 2     | 3          |
| Sustainability & Resilience                  | Relates to broader concepts of sustainable communities and resilience amongst community, system, environment or people                                                                                                                                                | 12    | 38         |
| Technical or technology & Infrastructure     | Relates to technical issues or solutions or technology/ies. Includes water/energy infrastructure at community and household level, tools, hardware and technologies for engagement or education or to facilitate interactions between community and service providers | 18    | 62         |
| Theory of Change                             | Relates to perceptions of how change in communities occurs, or behind design process etc.                                                                                                                                                                             | 15    | 46         |
| W_E_Demand Management                        | Relates to achieving water or energy efficiency or conservation or reduction measures                                                                                                                                                                                 | 23    | 108        |
| Water Restrictions                           | Relates to a method of demand management that switches water off or in other ways seeks to reduce consumption through restricting supply or consequences associated with using water at particular times                                                              | 3     | 11         |
| Water Quality & Health Issues                | Broad category relates to quality of water and health and safety – issues, concerns, consequences from management actions or community practices and behaviours, policy or regulatory rules and environments                                                          | 11    | 31         |
| Water Security - source                      | Relates to long-term and short-term supply of water and its abundance, security and sustainability including - aquifers, ground sources, desalination etc.                                                                                                            | 15    | 48         |

Note although there were 26 interviewees, two interviewees were interviewed on two separate occasions during the eighteen month period due to the first interview being cut short.
